# Supplementary material for: Investigation of free radicals and carbon structures in chars generated from pyrolysis of antibiotic fermentation residue
Source: Royal Society of Chemistry journal article supplement (doi:10.1039/c6ra22192k), 2016-01-01
Supplement: c6ra22192k1.pdf [file c6ra22192k1.pdf]

## Supplementary File

### Investigation of free radicals and carbon structures in chars generated from pyrolysis of antibiotic fermentation residue

Chen Hong<sup>a, b</sup>, Zhiqing Wang<sup>a</sup>, Yi Xing<sup>a, c\*</sup>, Yifei Li<sup>a</sup>, Qiang Yang<sup>a</sup>, Mengmeng Jia<sup>a</sup>, Lihui Feng<sup>a</sup>

- <sup>a</sup>. School of Energy and Environmental Engineering, University of Science and Technology Beijing, Beijing 100083, China. E-mail: xingyi@ustb.edu.cn; Tel: +86 010 62332206.  
<sup>b</sup>. Research Center for Eco-Environmental Sciences, Chinese Academy Science, Beijing 100085, China  
<sup>c</sup>. Beijing Key Laboratory of Resource-oriented Treatment of Industrial Pollutants, University of Science and Technology Beijing, Beijing 100083, China

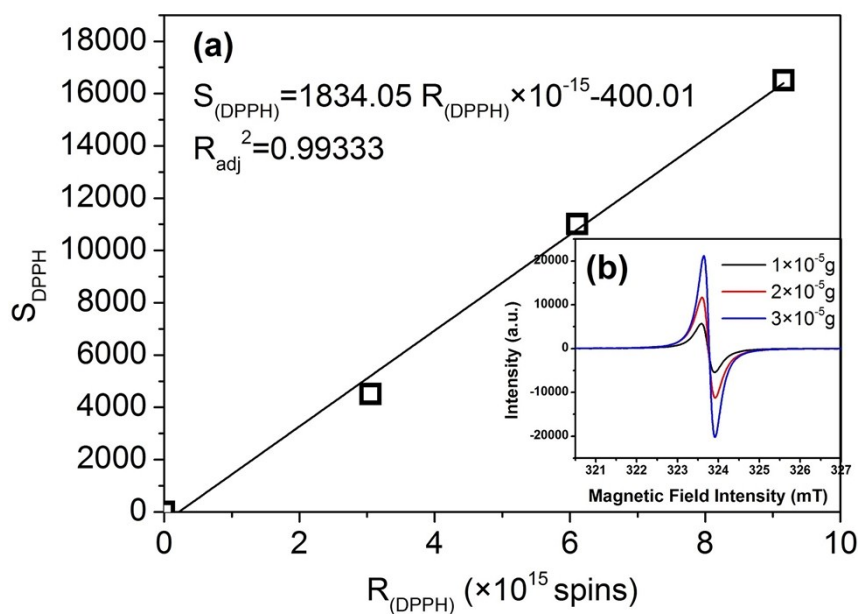

**Fig. S1** The standard curves (a) using the ESR spectra of DPPH (b)
